# Supplementary material
Source: publisher site journal article supplement (https://www.dovepress.com/article/334620)
Supplement: Supplementary file 1 [file get_supplementary_file.php]

| **Questions/ themes** | |
| --- | --- |
| 1. | 1. What was your motivation for applying to the VR program? 2. What were the expectations for the stay? |
| 2. | What knowledge from the VR program was useful in association to maintain or returning to work? Related to:   1. Activities 2. Work 3. Lifestyle |
| 3. | How do you experience the association between health and life in general? Related to:   1. Weight change 2. Family 3. Social participation 4. Quality of life 5. Physical activity 6. Work capacity |
| 4. | What promotes or hinders your work ability?   1. What influences your motivation to work? What does not motivate? 2. How does the workplace affect your work ability? 3. What makes your well-being or dissatisfaction at work? |
| 5. | What support have you had in the process of lifestyle change and work participation?   1. How do these relations affect your everyday life? 2. What relations promotes or inhibits your everyday life and lifestyle change? 3. What relations promotes or inhibits your work participation? |
| 6. | What do you think about further work participation? |
